# Supplementary material for: Select Porcine Elongation Factor 1α Sequences Mediate Stable High-Level and Upregulated Expression of Heterologous Genes in Porcine Cells in Response to Primate Serum
Source: MDPI journal article supplement (doi:10.3390/genes12071046), 2021-07-07
Supplement: s1 [file s1]

## Supplementary Materials

**Table S1.** Putative transcription-factor binding sites in the selected *pEF1 $\alpha$*  promoters compared with those of the *hEF1 $\alpha$*  promoter.

| Promoter      | DNA strand | AP1   | Sp1     | HSF   | CEBP  | GATA  | NF- $\kappa$ B |
|---------------|------------|-------|---------|-------|-------|-------|----------------|
| hEF1 $\alpha$ | +          | 3     | 38      | -     | 7     | -     | 3              |
|               | -          | 4     | 42      | 1     | 4     | 2     | 2              |
| pEF1 $\alpha$ | +          | - (3) | 49 (29) | - (1) | 3 (4) | -     | 1 (4)          |
|               | -          | - (1) | 45 (26) | - (1) | 3 (4) | 1 (1) | 1 (6)          |

AP1, activating protein 1; Sp1, specificity protein 1; NF- $\kappa$ B, nuclear factor kappa beta; HSF, heat shock factor; GATA, GATA transcription factor; C/EBP, CCAAT-enhancer-binding protein. The number of transcription-factor binding sites located in the extended region beyond the 5' end of the corresponding sequence of the *hEF1 $\alpha$*  promoter are shown in parentheses.

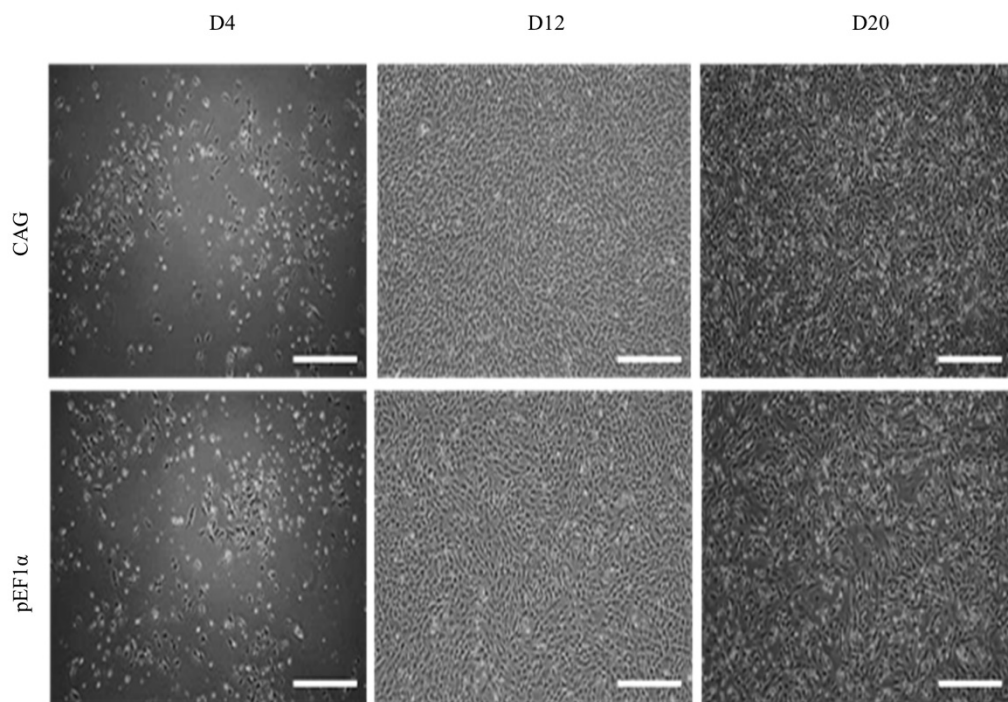

**Figure S1.** Morphological analysis of CAG- and the *pEF1 $\alpha$* -HLA-E expression cassettes transfected into PEFs and selected for on day 4 (D4), day 12 (D12), and day 20 (D20). The images revealed no changes in cell morphology. CAG, cytomegalovirus enhancer/chicken  $\beta$ -actin promoter; *pEF1 $\alpha$* , porcine elongation factor 1 $\alpha$ . Scale bars indicate 200  $\mu$ m.
